# Supplementary material for: Genetic inactivation of alpha-synuclein affects embryonic development of dopaminergic neurons of the substantia nigra, but not the ventral tegmental area, in mouse brain
Source: PeerJ. 2018 May 16;6:e4779. doi: 10.7717/peerj.4779 (PMC5960258; doi:10.7717/peerj.4779)
Supplement: Supplemental Information 1 [file peerj-06-4779-s001.xlsx]

## Sheet: TH_neurons_embrio
SN
aKO						Av	SE	WT					Av	SE
10.5	1985	1697	1414	2366	1347	1761.8	188.693	1976	1503	1054	1975	2511	1803.8	246.148
11.5	8602	5431	6651	5359	7192	6647	602.356	3841	1662	1718	2447	1837	2301	409.66
12.5	10012	6978	9960	9486	7353	8757.8	659.156	10819	12907	14120	13358	11401	12521	614.718
13.5	5581	4829	6727	2270	4746	4830.6	732.232	9219	8582	5769	5055	7649	7254.8	800.676
VTA E13.5
WT	aKO
16072	11829
11931	16427
17784	18333
15040	15389
18985	17609
15962.4	15917.4	Av
1215.92	1139.09	SE
